# Supplementary material for: Grape-seed Polyphenols Play a Protective Role in Elastase-induced Abdominal Aortic Aneurysm in Mice
Source: PubMed Central journal article supplement (PMC5570906; doi:10.1038/s41598-017-09674-4), 2017-08-24
Supplement: 41598_2017_9674_MOESM1_ESM.pdf [file 41598_2017_9674_MOESM1_ESM.pdf]

## **Grape-seed Polyphenols Play a Protective Role in Elastase-induced Abdominal Aortic Aneurysm in Mice**

Chao Wang<sup>1,2,3,#</sup>, Yunxia Wang<sup>1,2,4,#</sup>, Maomao Yu<sup>1,2,#</sup>, Cong Chen<sup>1,2,4</sup>, Lu Xu<sup>1,2</sup>,  
Yini Cao<sup>1,2,4</sup>, Rong Qi<sup>1,2,4,\*</sup>

<sup>1</sup> Peking University Institute of Cardiovascular Sciences, Peking University Health Science Center, Peking University, Beijing, 100191, China

<sup>2</sup> Key Laboratory of Molecular Cardiovascular Sciences, Ministry of Education, Beijing, 100191, China

<sup>3</sup> Second School of Clinical Medicine, Peking University, Beijing, 100044, China

<sup>4</sup> Beijing Key Laboratory of Molecular Pharmaceutics and New Drug Delivery Systems, Beijing 100191, China

# These three authors contributed equally to this work.

\* Corresponding author: [ronaqi@bjmu.edu.cn](mailto:ronaqi@bjmu.edu.cn)

## Supplemental Data

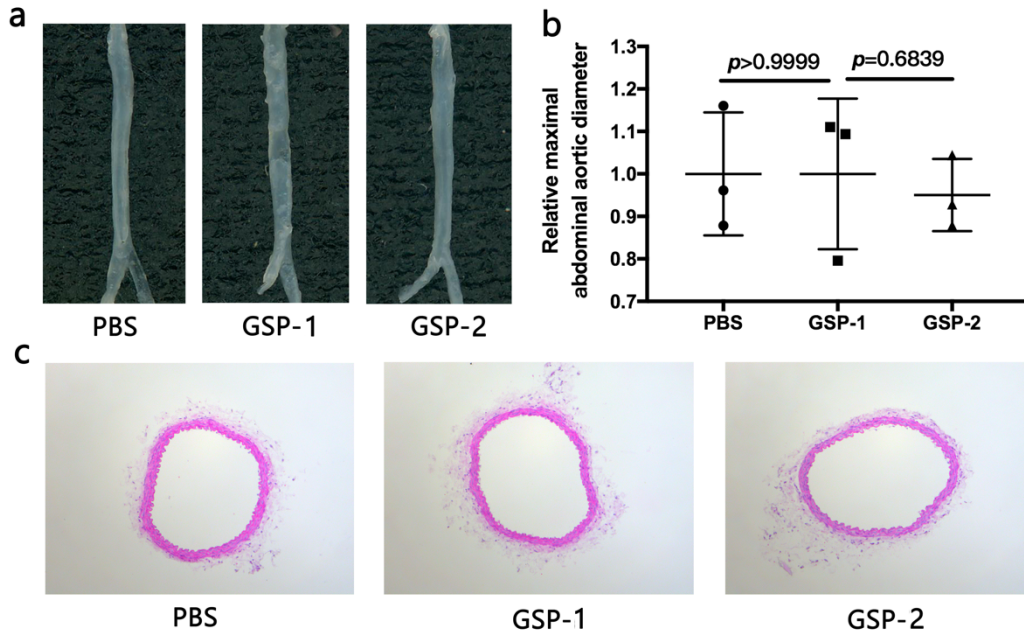

**Fig. S1** Effects of GSP on normal aorta. Effects of GSP on (a) morphology, (b) maximal abdominal aortic diameter, (c) H&E staining for aorta structure,  $n=3$ . PBS, GSP-1 and GSP-2 were represented the mice groups administrated by 0.01M PBS, 800 mg/kg GSP and 1600 mg/kg GSP, respectively.
